# Supplementary material for: In situ quantitative polymerization of dopamine on dual functional carbon nanotubes as high stability and rate capacity anodes for potassium ion storage
Source: Royal Society of Chemistry journal article supplement (doi:10.1039/d3nr01701j), 2023-01-01
Supplement: d3nr01701j1.pdf [file d3nr01701j1.pdf]

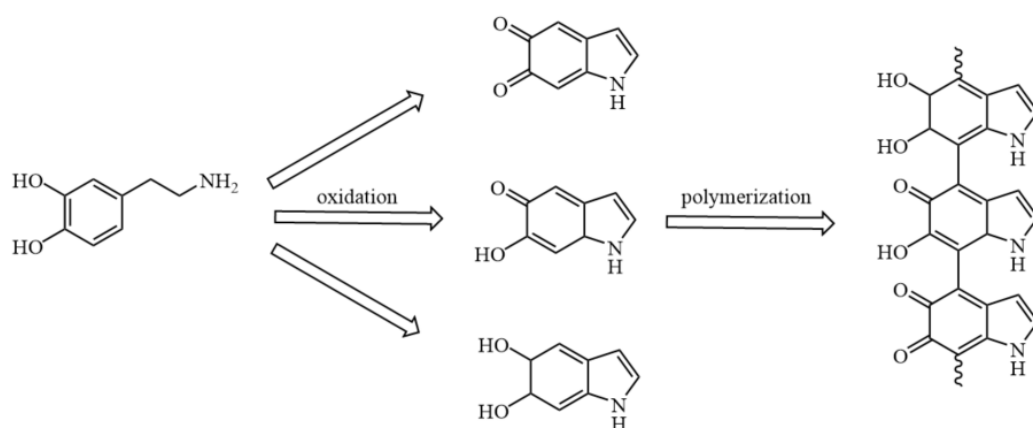

**Figure S1** Evolution of dopamine in deionized water

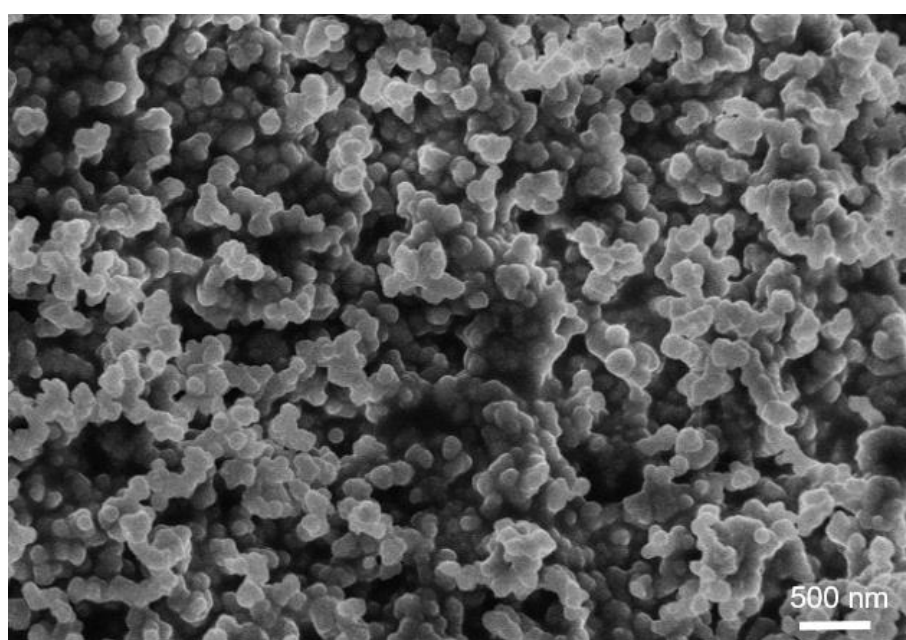

**Figure S2** SEM of Pure PDA

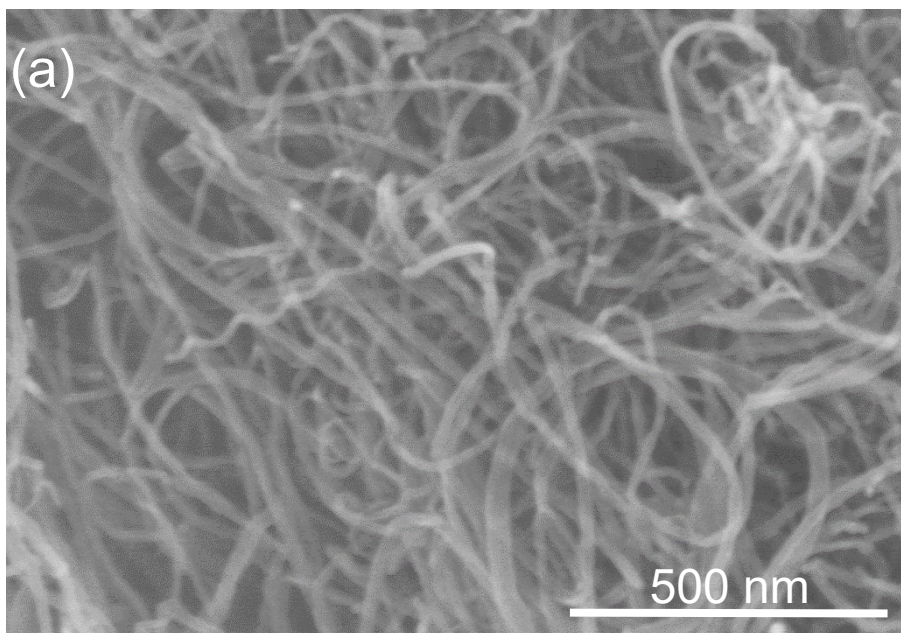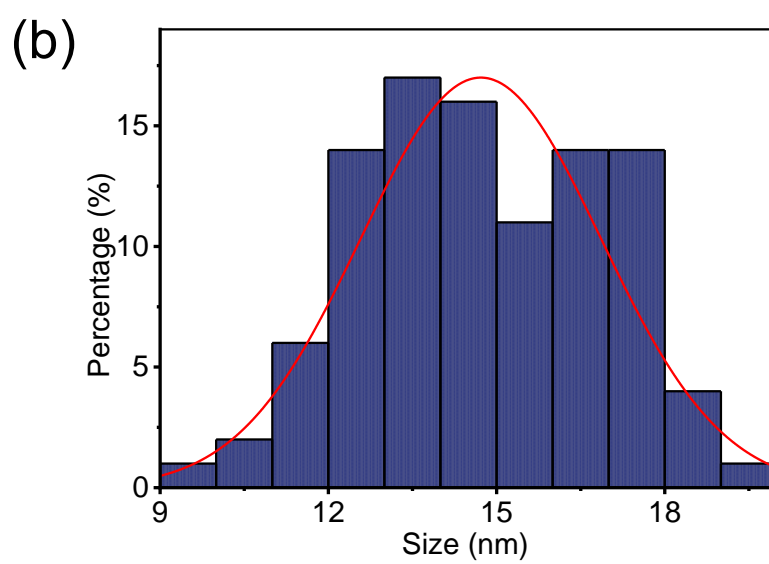

**Figure S3** (a)SEM of pure CNT and (b)measured diameter distribution

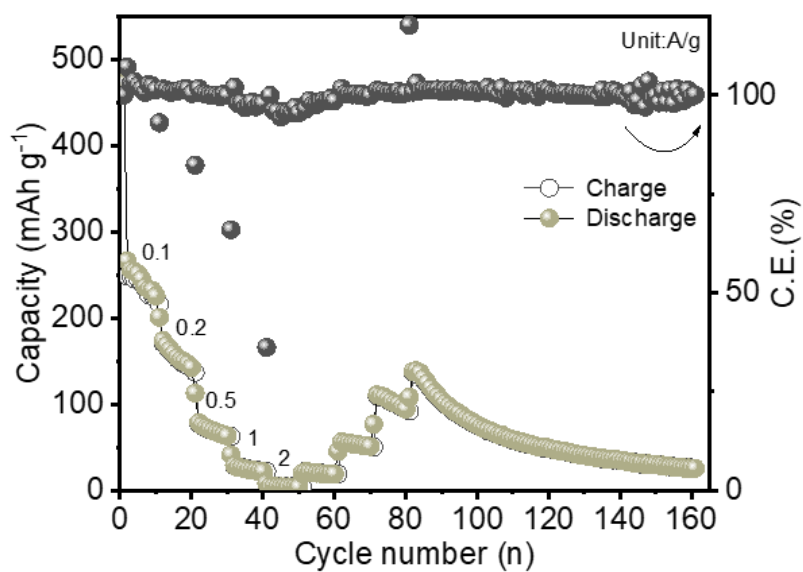

**Figure S4** Multiplication cycle of pure PDA

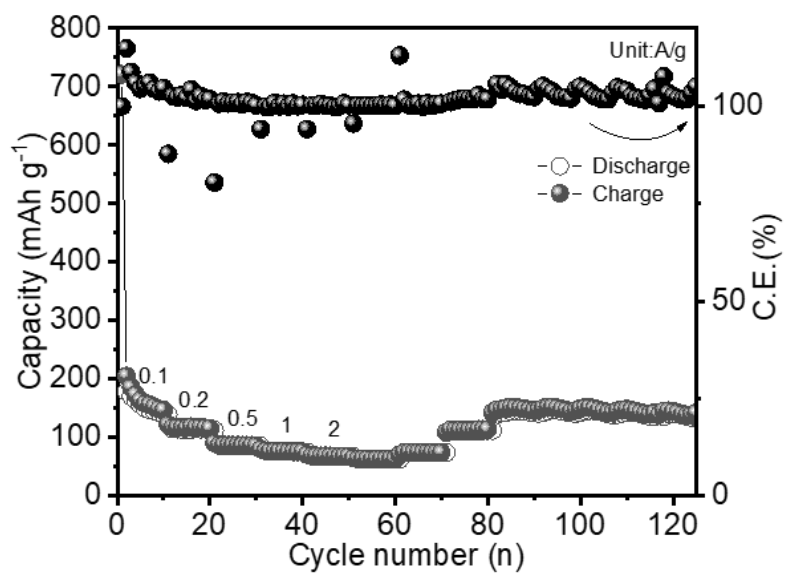

**Figure S5** Multiplication cycle of pure CNT

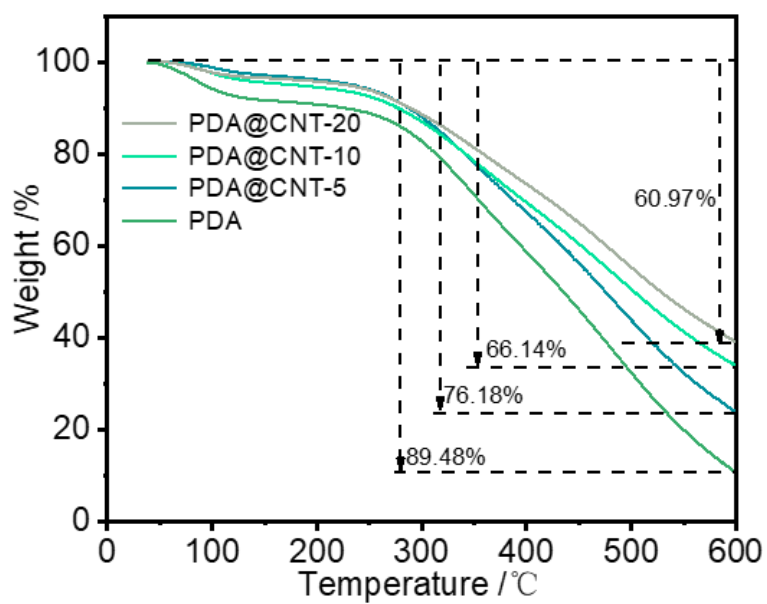

**Figure S6** TGA curve from room temperature to 600 °C with heating rate of 10 °C/min under air atmosphere

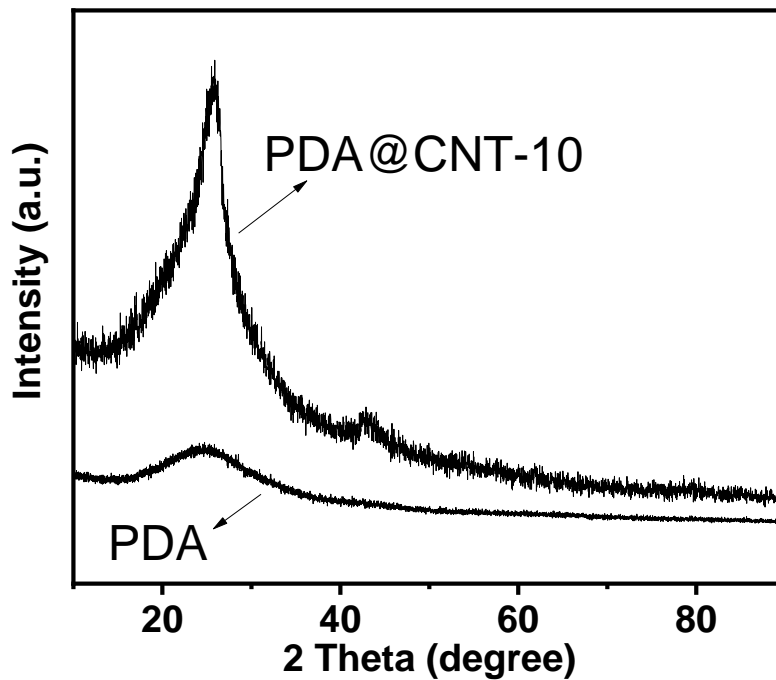

**Figure S7** XRD pattern of the PDA and PDA@CNT-10
